# Supplementary material for: A study of the conformational changes of β-lactoglobulin in the vicinity of critical point of binary mixed solvents
Source: Royal Society of Chemistry journal article supplement (doi:10.1039/c5nj02273h), 2015-12-02
Supplement: c5nj02273h1.pdf [file c5nj02273h1.pdf]

Electronic supplementary information for

**A study of conformational changes of  $\beta$ -lactoglobulin in the vicinity of critical point of binary mixed solvents**

R. Umapathi and P. Venkatesu\*

Department of Chemistry, University of Delhi, Delhi – 110007, India

Corresponding Author e-mail\*: venkatesup@hotmail.com; pvenkatesu@chemistry.du.ac.in; Tel: +91-11-27666646-142; Fax: +91-11-2766 6605.

Table 1S. Coexistence curves data from the temperature dependence of density measurements for IBW with different concentrations [ $C = 0.1$  mg/mL,  $0.25$  mg/mL,  $0.5$  mg/mL,  $1.0$  mg/mL and  $1.5$  mg/mL] of  $\beta$ -LG as a function temperature.

| $T \pm 0.002$ °C                                     | $\rho_l \pm 0.00005$<br>g.cm <sup>-3</sup> | $\rho_w \pm 0.00005$<br>g.cm <sup>-3</sup> |
|------------------------------------------------------|--------------------------------------------|--------------------------------------------|
| $T_c = 26.923$ , $C = 0$ mg/mL of $\beta$ -LG in IBW |                                            |                                            |
| 22.171                                               | 0.98716                                    | 1.00195                                    |
| 22.836                                               | 0.98740                                    | 1.00138                                    |
| 23.319                                               | 0.98762                                    | 1.00121                                    |
| 23.923                                               | 0.98786                                    | 1.00088                                    |
| 24.564                                               | 0.98811                                    | 1.00055                                    |
| 25.089                                               | 0.98857                                    | 1.00005                                    |
| 25.526                                               | 0.98909                                    | 0.99978                                    |
| 26.016                                               | 0.98986                                    | 0.99896                                    |
| 26.314                                               | 0.99049                                    | 0.99853                                    |
| 26.502                                               | 0.99109                                    | 0.99806                                    |
| 26.624                                               | 0.99138                                    | 0.99788                                    |
| 26.732                                               | 0.99188                                    | 0.99745                                    |

|        |         |         |
|--------|---------|---------|
| 26.824 | 0.99248 | 0.99671 |
| 26.902 | 0.99316 | 0.99585 |
| 26.912 | 0.99327 | 0.99566 |
| 26.914 | 0.99335 | 0.99554 |
| 26.916 | 0.99347 | 0.99545 |
| 26.917 | 0.99355 | 0.99531 |
| 26.918 | 0.99359 | 0.99526 |
| 26.919 | 0.99367 | 0.99511 |

---

| $T_c = 26.614$ | $C = 0.1 \text{ mg/mL of } \beta\text{-LG in IBW}$ |         |
|----------------|----------------------------------------------------|---------|
| 22.016         | 0.98743                                            | 1.00147 |
| 22.497         | 0.98764                                            | 1.00126 |
| 22.820         | 0.98768                                            | 1.00119 |
| 23.358         | 0.98791                                            | 1.00085 |
| 23.753         | 0.98813                                            | 1.00052 |
| 24.440         | 0.98854                                            | 1.00000 |
| 24.973         | 0.98894                                            | 0.99975 |
| 25.665         | 0.98987                                            | 0.99899 |
| 25.961         | 0.99047                                            | 0.99863 |
| 26.136         | 0.99105                                            | 0.99809 |
| 26.325         | 0.99135                                            | 0.99786 |
| 26.425         | 0.99185                                            | 0.99742 |
| 26.519         | 0.99250                                            | 0.99671 |
| 26.552         | 0.99316                                            | 0.99583 |
| 26.572         | 0.99325                                            | 0.99564 |
| 26.597         | 0.99331                                            | 0.99555 |
| 26.605         | 0.99343                                            | 0.99542 |
| 26.598         | 0.99356                                            | 0.99529 |
| 26.605         | 0.99361                                            | 0.99524 |
| 26.606         | 0.99369                                            | 0.99509 |

---

---

$T_c = 26.059$   $C = 0.25$  mg/mL of  $\beta$ -LG in IBW

---

|        |         |         |
|--------|---------|---------|
| 21.975 | 0.98780 | 1.00110 |
| 22.285 | 0.98783 | 1.00106 |
| 22.611 | 0.98786 | 1.00105 |
| 22.881 | 0.98796 | 1.00088 |
| 23.254 | 0.98813 | 1.00065 |
| 23.656 | 0.98831 | 1.00027 |
| 23.941 | 0.98842 | 0.99997 |
| 24.287 | 0.98880 | 0.99948 |
| 24.619 | 0.98918 | 0.99890 |
| 24.903 | 0.98967 | 0.99845 |
| 25.163 | 0.99015 | 0.99804 |
| 25.429 | 0.99060 | 0.99760 |
| 25.568 | 0.99107 | 0.99712 |
| 25.777 | 0.99164 | 0.99659 |
| 25.901 | 0.99214 | 0.99622 |
| 25.981 | 0.99267 | 0.99595 |
| 26.013 | 0.99316 | 0.99578 |
| 26.021 | 0.99357 | 0.99529 |
| 26.038 | 0.99362 | 0.99524 |
| 26.032 | 0.99371 | 0.99509 |

---

$T_c = 25.702$   $C = 0.5$  mg/mL of  $\beta$ -LG in IBW

---

|        |         |         |
|--------|---------|---------|
| 21.992 | 0.98812 | 1.00077 |
| 22.260 | 0.98815 | 1.00081 |
| 22.394 | 0.98819 | 1.00079 |
| 22.568 | 0.98819 | 1.00085 |
| 22.768 | 0.98831 | 1.00061 |
| 22.988 | 0.98836 | 1.00040 |
| 23.389 | 0.98861 | 1.00015 |
| 23.669 | 0.98885 | 0.99971 |

|        |         |         |
|--------|---------|---------|
| 23.969 | 0.98909 | 0.99948 |
| 24.216 | 0.98944 | 0.99917 |
| 24.569 | 0.98987 | 0.99862 |
| 24.814 | 0.99014 | 0.99827 |
| 24.989 | 0.99066 | 0.99792 |
| 25.127 | 0.99090 | 0.99767 |
| 25.268 | 0.99127 | 0.99747 |
| 25.385 | 0.99170 | 0.99703 |
| 25.558 | 0.99247 | 0.99685 |
| 25.615 | 0.99295 | 0.99632 |
| 25.673 | 0.99334 | 0.99569 |
| 25.687 | 0.99369 | 0.99518 |

---

$T_c = 25.112$     $C = 1.0$  mg/mL of  $\beta$ -LG in IBW

---

|        |         |         |
|--------|---------|---------|
| 22.012 | 0.98845 | 1.00032 |
| 22.184 | 0.98848 | 1.00024 |
| 22.508 | 0.98860 | 1.00022 |
| 22.708 | 0.98869 | 1.00020 |
| 22.916 | 0.98874 | 1.00001 |
| 23.217 | 0.98894 | 0.99996 |
| 23.432 | 0.98907 | 0.99961 |
| 23.633 | 0.98927 | 0.99936 |
| 23.874 | 0.98950 | 0.99909 |
| 24.093 | 0.98962 | 0.99869 |
| 24.289 | 0.98997 | 0.99841 |
| 24.445 | 0.99023 | 0.99807 |
| 24.596 | 0.99043 | 0.99786 |
| 24.730 | 0.99076 | 0.99740 |
| 24.868 | 0.99117 | 0.99698 |
| 24.940 | 0.99160 | 0.99661 |
| 25.037 | 0.99205 | 0.99611 |

|        |         |         |
|--------|---------|---------|
| 25.078 | 0.99268 | 0.99561 |
| 25.093 | 0.99316 | 0.99524 |
| 25.097 | 0.99369 | 0.99523 |

---

$T_c = 24.481$     $C = 1.5 \text{ mg/mL of } \beta\text{-LG in IBW}$

---

|        |         |         |
|--------|---------|---------|
| 22.044 | 0.98891 | 0.99981 |
| 22.293 | 0.98894 | 0.99983 |
| 22.547 | 0.98892 | 0.99976 |
| 22.785 | 0.98902 | 0.99975 |
| 23.054 | 0.98914 | 0.99961 |
| 23.275 | 0.98928 | 0.99941 |
| 23.472 | 0.98953 | 0.99924 |
| 23.631 | 0.98963 | 0.99899 |
| 23.813 | 0.98982 | 0.99877 |
| 23.982 | 0.99009 | 0.99846 |
| 24.085 | 0.99034 | 0.99818 |
| 24.187 | 0.99051 | 0.99793 |
| 24.309 | 0.99098 | 0.99763 |
| 24.351 | 0.99141 | 0.99731 |
| 24.375 | 0.99173 | 0.99684 |
| 24.419 | 0.99188 | 0.99652 |
| 24.431 | 0.99219 | 0.99606 |
| 24.453 | 0.99272 | 0.99580 |
| 24.466 | 0.99329 | 0.99543 |
| 24.472 | 0.99355 | 0.99509 |

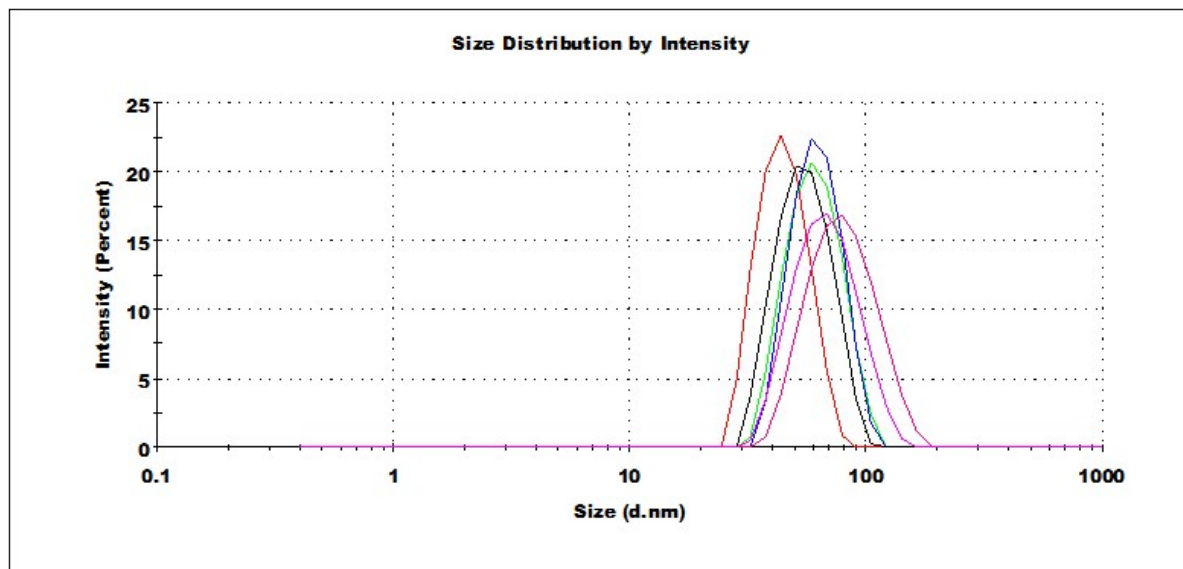

Fig. 1 S. Scattering vs. size distribution graph at their respective  $T_c$  values for  $\beta$ -LG, 0.0 (black), 0.1 (red), 0.25 (green), 0.5 (blue), 1.0 (cyan) and 1.5 mg/mL (pink) in IBW mixture.
